# Supplementary material for: The Joubert Syndrome Gene arl13b is Critical for Early Cerebellar Development in Zebrafish
Source: PubMed Central journal article supplement (PMC7475164; doi:10.1007/s12264-020-00554-y), 2020-08-18
Supplement: 12264_2020_554_MOESM1_ESM.pdf [file 12264_2020_554_MOESM1_ESM.pdf]

# Supplementary Materials

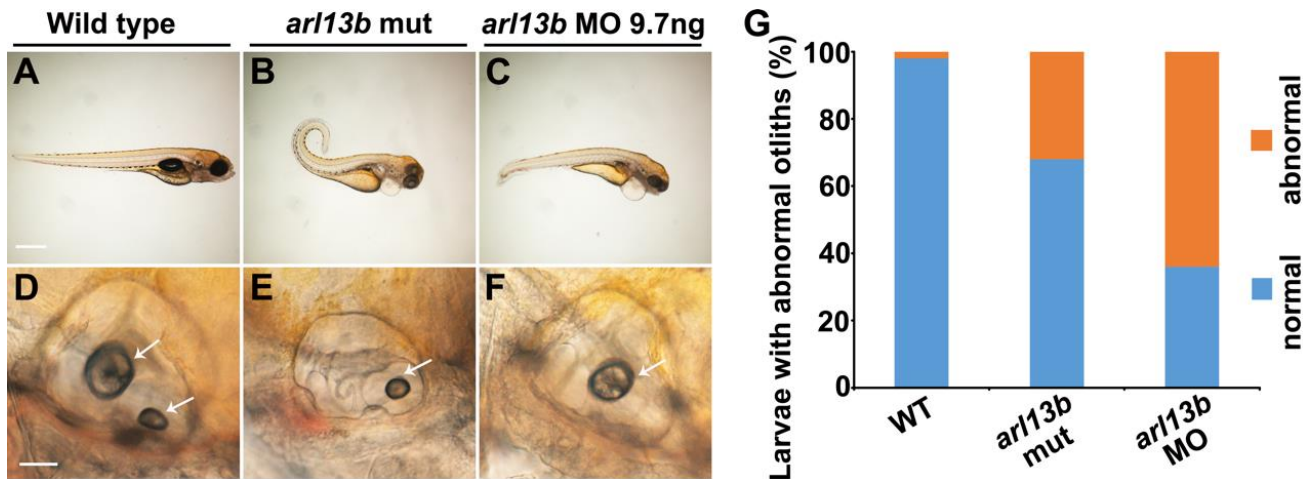

**Fig. S1** Disruption of *arl13b* results in morphological defects. **A–C** Wild-type embryos are straight at 4 dpf while the bodies of *arl13b* mutants and morphants are curved. **D–G** There are usually two otoliths in the inner ear; however, the otoliths of *arl13b*-deficient embryos have defects in number, size, and morphology. A-C, Scale bar 400  $\mu$ m. F-I'', D-F, Scale bar 100  $\mu$ m.

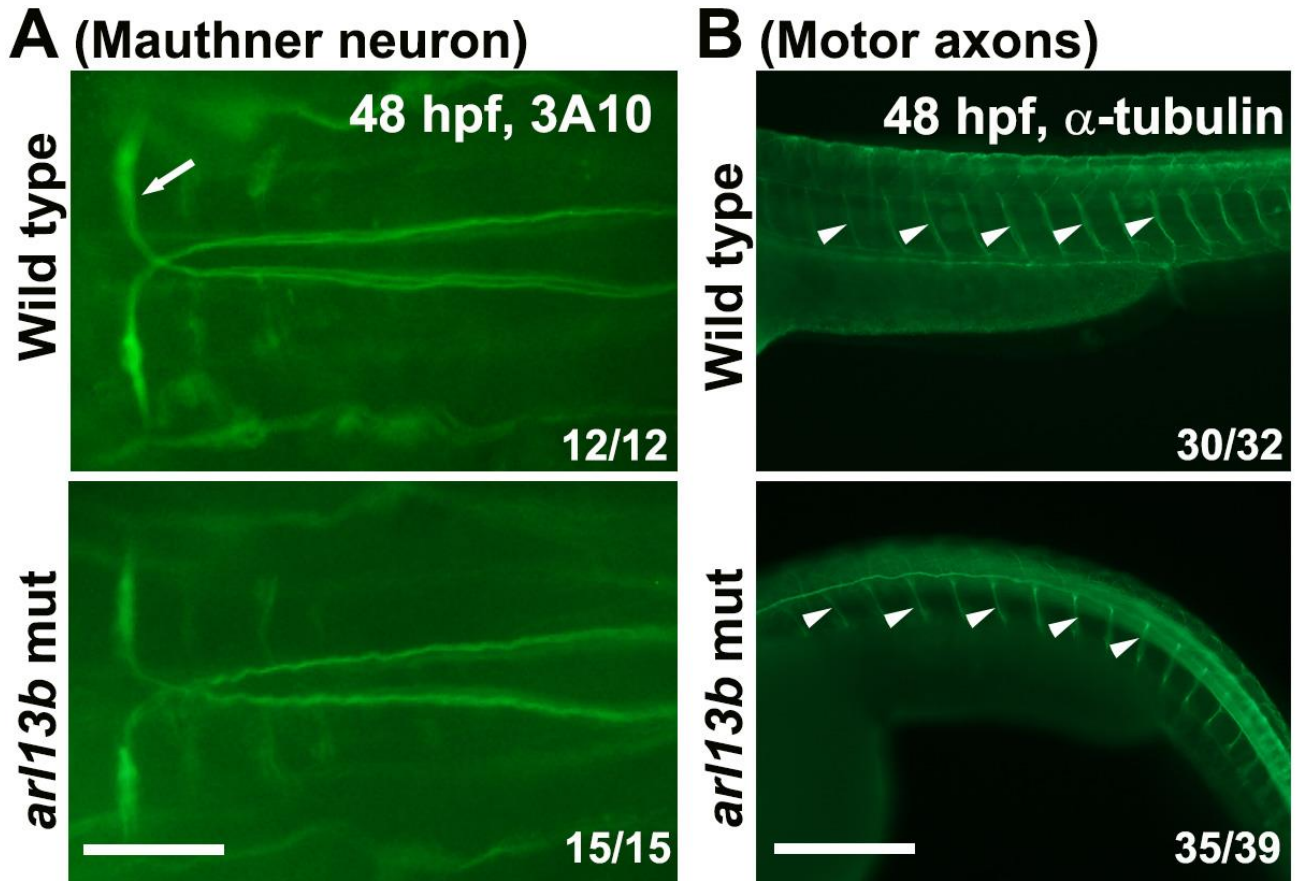

**Fig. S2** Locomotion-related neurons remain intact in *arl13b*-deficient embryos. **A** Mauthner neurons still grow out axons, which normally cross the midline and project caudally, in *arl13b*-mutants. **B** No defect of motor axons is detectable in *arl13b*-mutants. A-B, Scale bar 100  $\mu$ m.

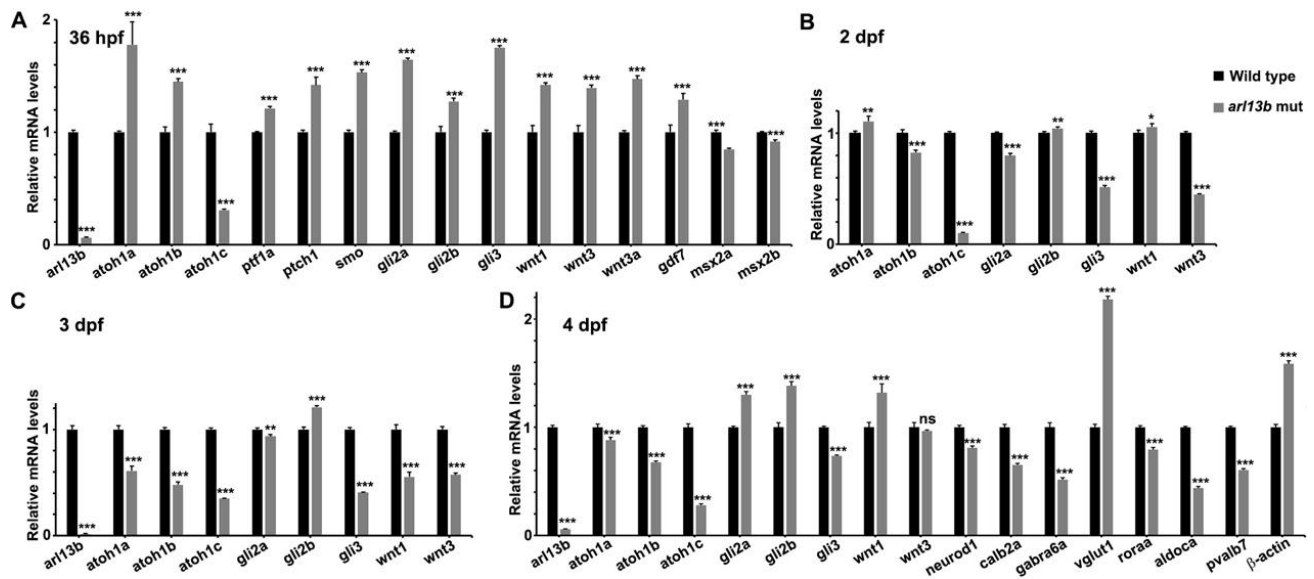

**Fig. S3** The expression levels of a network of genes are altered dynamically in *arl13b* mutants. Total RNAs were extracted from wild type and *arl13b* mutant embryos (whole mount) and reversely transcribed. The obtained cDNAs were used as templates for real time quantitative PCR (q-PCR). The expression levels of the genes are normalized to that of elongation factor EF1 $\alpha$ . *arl13b* is significantly reduced in mutants, confirming that the embryos picked on the basis of curved tails are virtually *arl13b* mutants with high penetration, consistent with published data. The expression levels of *atoh1a* and *1b* (granule cell precursors) and *ptf1a* (Purkinje cell precursors) are dynamically regulated in *arl13b* mutants. The expression level of *atoh1c* continually declines in *arl13b* mutants at all developmental stages. The expression levels of Shh signaling (*ptch1*, *smo*, *gli2a*, *gli2b*, and *gli3*), Wnt signaling (*wnt1*, *wnt3*, and *wnt3a*), and BMP signaling (*gdf7*, *msx2a*, and *msx2b*) are altered by *arl13b* deficiency. The molecules expressed in differentiated granule cells (*neurod1*, *calb2a*, *gabra6a*, and *vglut1*) and Purkinje cells (*roraa*, *aldoca*, and *pvalb7*) are also altered. \* $P < 0.05$ , \*\* $P < 0.01$ , \*\*\* $P < 0.001$ .

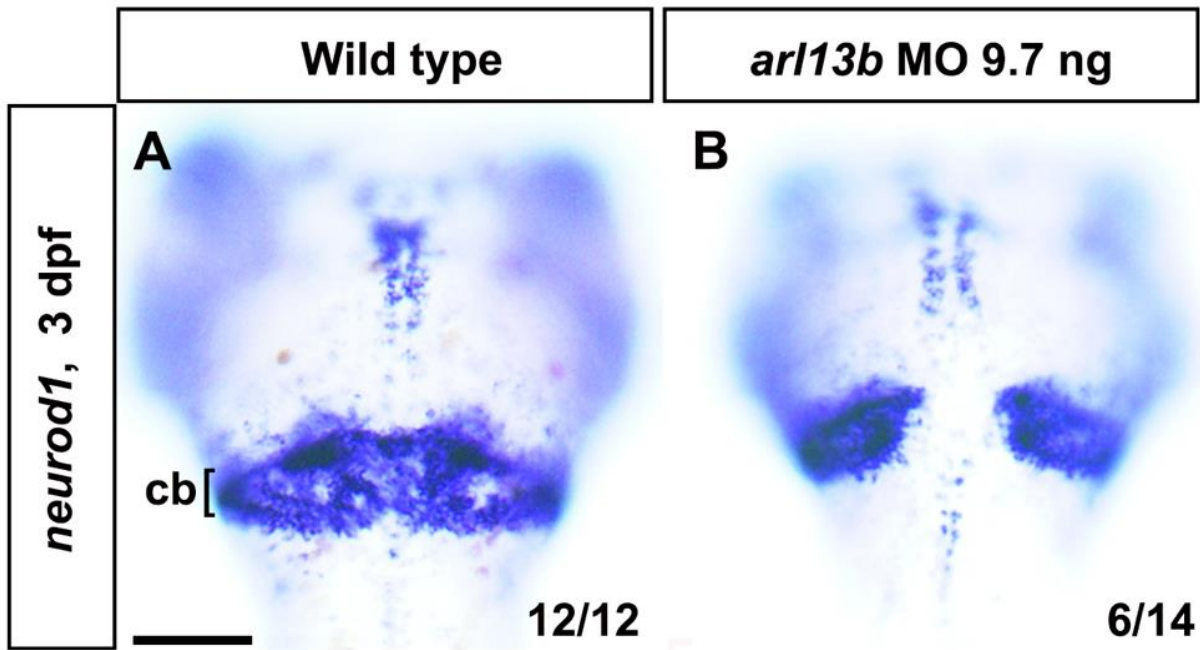

**Fig. S4** The expression of granule cell marker *neruod1* is specifically reduced in the dorsomedial clusters. The dorsomedial clusters of cerebellar granule neurons are specifically impaired by *arl13b* disruption. A-B, Scale bar 100  $\mu$ m.

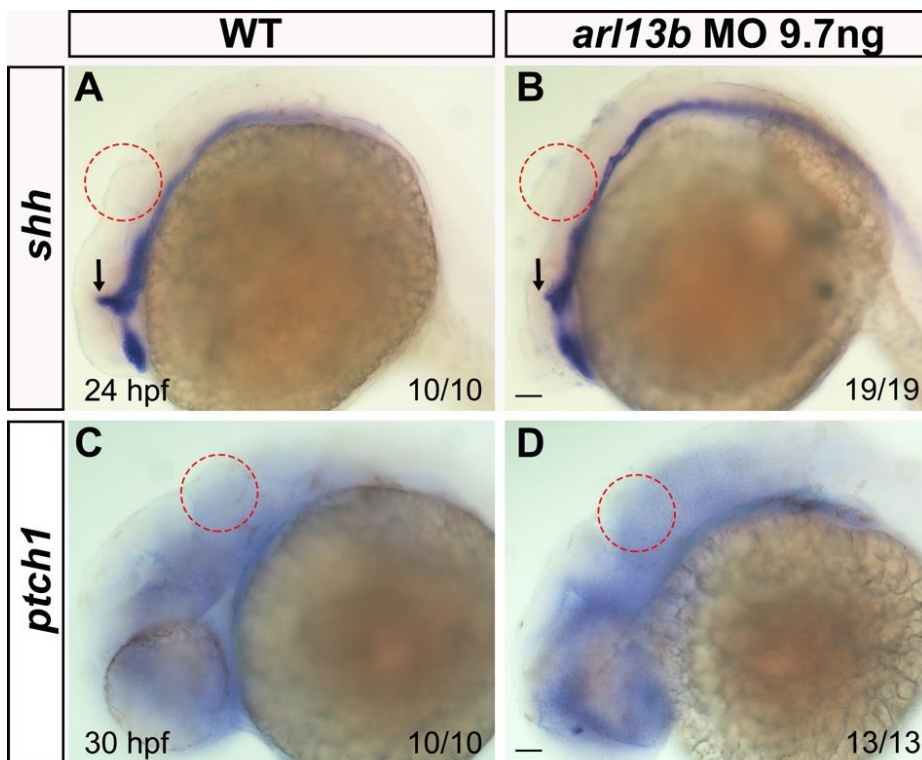

**Fig. S5** The expression of *shh* and its receptor, *patched1* (*ptch1*), is not altered by *arl13b* knockdown. **A, C** The expression of Shh signaling pathway components, *shh* and *ptch1*, is barely detectable in the cerebellum (dashed circles) by *in situ* hybridization in wild-type embryos. **B, D** Their expression is not altered by *arl13b* morpholino treatment although the expression of *shh* is changed in the dorsal zona limitans intrathalamica (arrows). A-D, Scale bar 100  $\mu$ m.

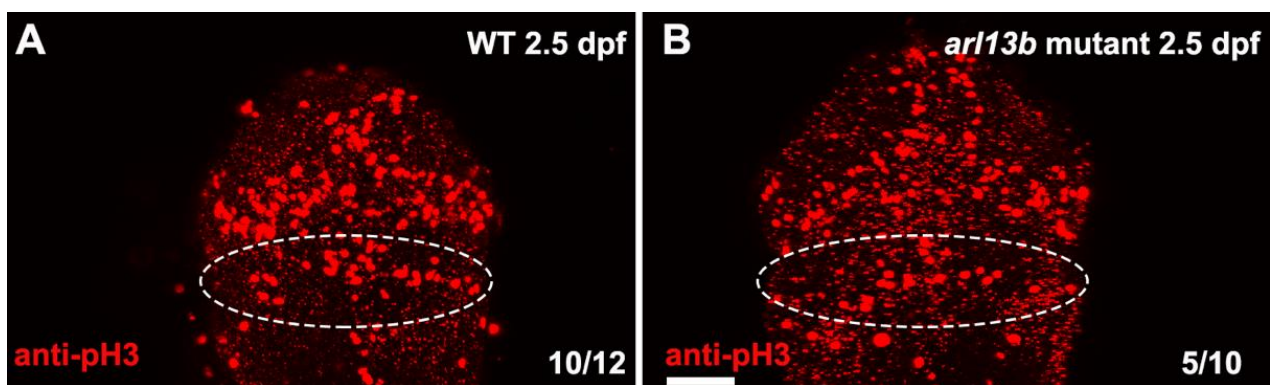

**Fig. S6** The proliferation of cells in the cerebellum is impaired in *arl13b* mutants. **A, B** Representative images of wild-type and *arl13b* mutant embryos immunostained with anti-pH3 antibody. The cerebellum is outlined by the dashed oval. A-B, Scale bar 100  $\mu$ m.

## Supplemental Tables

**Table S1** PCR primers for amplifying gene-specific products

| Gene          | Primers                                           | Size (bp) |
|---------------|---------------------------------------------------|-----------|
| <i>atoh1b</i> | AAGCGTCATTCCTTCATTGGAG<br>ACAAGTATTGACGTGTGCTGAG* | 402       |

|                |                                                          |          |
|----------------|----------------------------------------------------------|----------|
| <i>atoh1c</i>  | ATGCCCCATCCGGACACCCCTTTTGG<br>CTATTTTACACCATTGTTCTTTCCA* | 615      |
| <i>neurod1</i> | TTTGGGCTCTTTCGGAAATCTTG<br>AGACCCGCTGCCTGATAGTG*         | 469      |
| <i>wnt1</i>    | CCCAAATAACAAGTCAGC<br>AAGCCCTCCCTATTTACCAC*              | 947      |
| <i>ptch1</i>   | ATACCAAGTGTTGCATGGTG<br>AGCTCATTAACGGCAAGAG*             | 638      |
| <i>zic1</i>    | GAAAATCTGAAAATCCACAAAA<br>GGTGCTGTGGCTGCTCGTGT*          | 365      |
| *              | T3 promoter                                              | sequence |

(GGATCCATTAACCCTCACTAAAGGGAA) is added to the 5'-end of the reverse primer for transcription of the gene *in vitro*.

**Table S2** PCR primers for quantitative real-time PCR.

| Gene           | Primer                                         |
|----------------|------------------------------------------------|
| <i>β-actin</i> | CGGTTTTGCTGGAGATGATGC<br>TGGGGTATTTGAGGGTCAGGA |
| <i>arl13b</i>  | GGAGAGAACCTGCAAGGAAGG<br>GATTCCTCTGACTGTCGCCG  |
| <i>atoh1a</i>  | CCCAGGCAAAATATCCGTCCCT                         |

CAAGGCTGGTGGGTACTCGCT

*atoh1b* CCTCAAGCTGCCTCTGAAGA  
GGGCCATCTGAAGAGTGTC

*atoh1c* CCCGAGAGAGGAGGAGGATG  
GGGTATGGGGTTTCTGGGTC

*neurod1* CGAGCAGAGCCAGGAGAT  
AGGGTGGTGTCAAAGAACG

*vglut1* CTGTGGAGGGTTTGGAAATGGA  
GCGATGTCAAGATGGTTCACA

*gabra6b* TCTTGTGTTGGACAGGTGGTG  
AGGTCGGAGTCTGTTGTCATATC

*ptf1a* TCGATCTCACATCCCAACA  
CCGTAGTCTGGGTCATTTGGA

*rora* TGGCCCAGAACATTTCCAAGT  
TGGCAAACCTCCACCACATACT

*pvalb7* ATCCTGAGTGAGACCGAGCT  
TGTGGTCGAAACTGTCAGCA

*calb2a* CCTTACCTTCACTTGGCGGA  
GCTCCTCTCCTCGCAATCTC

*aldoca* GCGTCCCGTTTGTCAAGATG  
GGCAAAGTCAGCTCCATCCT

*gdf7* AACACGGTCACCAGCTTCAT

GCAGCTCCACTTCCATCAGT

*msx2a* AGGAGCGAGTCAACTTCACG  
CAAGAGCTGAGCAGTGGTGA

*msx2b* AGAAGGCGAGAGGATGTGTCCAG  
GATTGGTCTTGTGCTTGCGGAG

*wnt1* ATGTGTCCTCCTGGTGTCTCTC  
CTGGCGGCGACTTAGCAGTG

*wnt3* AGCAGCAGCAAACCTTGGAG  
CCCGAGAGCTGGAGAACCAC

*wnt3a* CTCCGCTTCTGCCGCAACTAC  
CTGATGCTGACACTCCTGGATGC

*gli2a* CAGCACCAGCAGCAGCACTG  
CCTTGGACCGCTTGAAGATCATGG

*gli2b* GCGGTCAGCAGCACAGTCAAC  
ACAGTCGTCCATGTCCTCCTTCAG

*gli3* TTGCCATGGACCCTCGTTCT  
GGTACTGGCGAGGGTTCGTA

*ptch1* TGCGCTGGAGCAGATATCAGAGG  
TCCACGTCCGTCTCCAGATTAGC

*smo* TGGCATTGCTTTGTCGGCT  
CAGCCCTGGATGGTTGCTTTTA

---
